1 **Title:**

2 Pneumococcal carriage requires KDM6B, a histone demethylase, for its unique inflammatory signature.

3

4 **Authors:**

5 Michael G. Connor<sup>1</sup>, Emma Patey<sup>1</sup><sup>φ</sup>, Orhan Rasid<sup>1</sup>, Laura Barrio<sup>2</sup>, Daniel P. Miller<sup>4</sup>, Richard J. Lamont<sup>3</sup>,  
6 Jost Enninga<sup>2</sup>, and Melanie A. Hamon<sup>1\*</sup>

7

8 **Affiliations:**

9 <sup>1</sup> Institut Pasteur, G5 Chromatin and Infection, Paris, France

10 <sup>2</sup> Institut Pasteur, Dynamics of Host-Pathogen Interactions Unit, Paris, France

11 <sup>3</sup> University of Louisville, Center for Oral Health and Systemic Disease, School of Dentistry, University of  
12 Louisville, Louisville, Kentucky, United States of America

13 <sup>4</sup> Virginia Commonwealth University School of Medicine Dept of Microbiology and Immunology,  
14 Richmond, Virginia, United States of America

15

16 <sup>φ</sup>Current address University of Glasgow, Scotland, UK

17

18 \* Melanie Hamon (melanie.hamon@pasteur.fr)

19

20 **Abstract:**

21 *Streptococcus pneumoniae* (*Sp*), a natural colonizer of the human respiratory tract, is a diverse  
22 species with over 90 serotypes. Initial pneumococcal colonization of the human nasopharynx induces  
23 two distinct host outcomes; asymptomatic carriage or symptomatic invasive pneumococcal disease  
24 depending on the serotype and the host response. Epithelial cells are among the first to encounter both  
25 carriage and invasive serotype isolates of pneumococcus. However, the cellular processes responsible  
26 for the divergent host responses are largely unknown, as is the contribution of epithelial cells to this  
27 process. Here, we show a serotype 6B carriage isolate induces a unique inflammatory signature distinct  
28 from invasive serotype 4 (Tigr4). This inflammatory signature is characterized by activation of p65 (RelA)  
29 and requires a histone demethylase, KDM6B. At the molecular level, we show that interaction of  
30 serotype 6B with epithelial cells leads to chromatin remodeling within the IL-11 promoter in a KDM6B  
31 dependent manner. We show KDM6B specifically demethylates histone H3 lysine 27 di-methyl, and this  
32 facilitates p65 access to three NF- $\kappa$ B sites, which are inaccessible when stimulated by IL-1 $\beta$  or Tigr4.  
33 Finally, we demonstrate through chemical inhibition of KDM6B, with GSK-J4 inhibitor, and through  
34 exogenous addition of IL-11 that the host response to carriage or invasive phenotypes can be  
35 interchanged. Therefore, we demonstrate that epithelial response to either carriage or invasive  
36 serotypes of *S. pneumoniae* is divergent and is mediated through chromatin remodeling by KDM6B.

37

38

39 **Introduction:**

40 *Streptococcus pneumoniae* (*Sp*), a clonal species with more than 90 serotypes, naturally  
41 colonizes the upper respiratory tract of humans<sup>1-6</sup>. Pneumococcal serotypes are found as either carriage  
42 isolates, which are asymptomatic and eventually cleared by the host, or as invasive isolates, which lead  
43 to symptomatic disease<sup>5,7,8</sup>. Globally, invasive *S. pneumoniae* is a priority pathogen due to its ability to  
44 cause lethal pneumococcal infections resulting from pneumonia, sepsis, or meningitis<sup>4,9</sup>. Importantly,  
45 colonization of the nasopharynx is a prerequisite for both pneumococcal carriage and invasive disease  
46 <sup>2,3,5,10,11</sup>.

47 At these initial colonization events, pneumococcus interacts with the host nasopharyngeal  
48 epithelial barrier and the innate immune system. Epithelial cells are among the first responders to  
49 pneumococcus and play a pivotal role in dictating pulmonary innate immune responses upon infection<sup>12</sup>.  
50 Recent insights using the experimental human pneumococcal carriage (EHPC) model have highlighted  
51 the essential role of NF- $\kappa$ B driven inflammatory responses for susceptibility, pathogenesis and  
52 transmission of pneumococcus<sup>8,10,13-15</sup>. However, it is still largely unknown how these cellular processes  
53 are shaped at the molecular level and result in symptomatic or asymptomatic *S. pneumoniae* infections.

54 NF- $\kappa$ B is a master transcriptional regulator of both pro- and anti-inflammatory host responses<sup>16-</sup>  
55 <sup>26</sup>. Briefly, NF- $\kappa$ B is comprised of multiple subunits that form hetero- or homodimers, of which the best  
56 characterized subunit is p65 (RelA)<sup>27,28</sup>. Activation of p65 occurs through posttranslational modifications  
57 (PTMs), such as phosphorylation of serine 536, in response to cellular sensing of inflammatory stimuli  
58 (i.e. LPS or interleukin 1 beta (IL-1 $\beta$ ))<sup>28</sup>. Ultimately, activated p65 binds to a kappa-binding consensus  
59 sequence site within the nucleus to initiate transcription of NF- $\kappa$ B dependent genes<sup>29</sup>. However, cellular  
60 signaling alone is not enough, as a full NF- $\kappa$ B response also requires chromatin remodeling at the  
61 targeted inflammatory gene loci<sup>16-26</sup>.

62 Chromatin, is a highly ordered structure of DNA wrapped around histone proteins. Chromatin  
63 dynamically shifts between open (euchromatin), and closed (heterochromatin) states, and these states  
64 influence gene accessibility and transcription<sup>30-34</sup>. Switching between these two states is the result of  
65 chromatin remodeling enzymes/complexes reading, writing and erasing PTMs on histone tails. The  
66 enzymes regulating histone PTMs have been identified, and have been shown to play important roles in  
67 transcriptional responses during cellular signaling events, such as NF- $\kappa$ B responses<sup>16,35</sup>. One of these  
68 enzymes is KDM6B (JMJD3), a histone demethylase, associated with NF- $\kappa$ B. KDM6B belongs to the  
69 Jumonji C- domain family (JMJD) of histone demethylases, of which KDM6B is the only member  
70 expressed universally outside of embryonic development<sup>24,36</sup>. Primarily through peptide studies, KDM6B

71 is thought to target the repressive histone marks, lysine 27 tri-methyl (H3K27me3) and di-methyl  
72 (H3K27me2)<sup>24,37-39</sup>. To date, mounting evidence, mainly in macrophages, suggests KDM6B is essential  
73 for modulating inflammatory gene expression upon wound healing, LPS stimulation and immunological  
74 tolerance to anthrax toxin<sup>20-23,40</sup>. However, to our knowledge, no role for KDM6B during bacterial  
75 infection has been studied to date.

76         Herein, we demonstrate a pneumococcal carriage isolate of serotype 6B specifically activates a  
77 unique inflammatory signature through p65. This inflammatory signature includes upregulation of  
78 KDM6B and IL-11 in human epithelial cells, and these are essential for epithelial cell integrity during  
79 challenge with 6B. We demonstrate upon challenge with serotype 6B the promoter of IL-11 is  
80 remodeled via KDM6B demethylation of H3K27me2, which allows p65 binding at three NF- $\kappa$ B sites  
81 upstream of the IL-11 transcription start site. We demonstrate the importance of this process in  
82 regulating epithelial cell integrity as inhibition of KDM6B leads to increased 6B induced epithelial  
83 damage; whilst exogenous addition of IL-11 partially rescues serotype 4 (Tigr4) induced cell damage.  
84 Thus, we show with chemical inhibition of KDM6B and IL-11, carriage and invasive epithelial-  
85 pneumococcal phenotypes can be interchanged.

86

## 87 **Results:**

### 88 Serotype 6B actively induces a unique inflammatory profile.

89         The differential cellular processes driving the host response during carriage or invasive  
90 pneumococcal disease is not entirely known. To address this, we completed an exploratory microarray  
91 of human A549 epithelial cells 2hrs post-challenge with either the laboratory invasive strain Tigr4  
92 (serotype 4) or the pneumococcal carriage strain of serotype 6B (clinical isolate; ST90 CC156 lineage F;  
93 Fig 1A). In comparison with uninfected cells, 6B differentially influenced 388 transcripts (200  
94 upregulated and 188 downregulated); whilst Tigr4 modulated the expression of 1,205, (143 upregulated  
95 and 1,062 downregulated) (Sup. Table1). Strikingly, a large proportion of the total genes differentially  
96 regulated by 6B were inflammatory genes containing NF- $\kappa$ B binding sites (12% by 6B vs. 3% by Tigr4; Fig  
97 1B). To confirm this result, we selected a panel of 41 inflammatory genes, including genes from the  
98 microarray (*IL-11*, *KDM6B* (*JMJD3*), *PTGS2*, *CXCL8* (*IL8*), *FOS* and *JUNB*), to test by RT-PCR. Indeed, upon  
99 epithelial cell colonization *in vitro*, 6B induced an inflammatory profile, with significantly increased  
100 expression of *CSF2* (*GM-CSF*), *CXCL1*, *CXCL2*, *CXCL3*, *IL11*, *KDM6B* and *TLR9* ( $pV \leq 0.05$ ) in comparison to  
101 Tigr4 (Fig. 1C; Sup. Table2). Thus, 6B challenged epithelial cells have a transcriptional profile that is more  
102 inflammatory than that of Tigr4.

103 We further cross-compared the same panel against IL-1 $\beta$  (Sup. Table2), a known pro-  
104 inflammatory stimulus activating p65 (RelA). Using the relative expression data obtained from RT-PCR,  
105 we performed a principal component (PCA) on the expression values for 6B, Tigr4 and IL-1 $\beta$  (Fig. 1D).  
106 Comparative analysis of the biplot of the first two components showed three groups, which accounted  
107 for 64.3% of the total variance. This clearly demonstrated 6B was actively inducing a unique  
108 inflammatory signature distinct from both Tigr4 and IL-1 $\beta$ . To determine if RT-PCR results reflected  
109 protein expression, we performed immunofluorescence staining for KDM6B, one of the genes  
110 differentially expressed, at 2hrs post-challenge (Fig. 1E; Rep. images Sup. Fig. 1A). A549 cells were  
111 challenged with either 6B, Tigr4, or paraformaldehyde killed 6B (PFA 6B). Two hours post-challenge the  
112 nuclear ratio of KDM6B to DAPI signal intensity was quantified. For 6B there was a significant increase in  
113 nuclear KDM6B ( $pV \leq 0.001$ ) compared to Tigr4 and uninfected cells, which mirrored our expression  
114 analysis. Furthermore, we did not see a significant increase in nuclear KDM6B following challenge with  
115 paraformaldehyde-killed 6B, which suggests that this is an active process due to pneumococcal-  
116 epithelial interaction, as paraformaldehyde fixation not only inactivates pneumococcus, but is known to  
117 maintain bacterial morphology including pili, and extracellular polymeric substances, such as capsule<sup>41</sup>.

118 To determine whether expression of KDM6B in response to 6B was specific, we tested two  
119 additional JMJD methyltransferases (KDM7A and KDM8), and a non-related methyltransferase (EHMT2).  
120 KDM6B was the only one to be significantly upregulated by 6B (Sup. Fig. 1B). Together these results  
121 show 6B induces a differential transcriptional response in epithelial cells characterized by upregulation  
122 of KDM6B.

123

#### 124 6B inflammatory profile requires p65 activation and catalytically active KDM6B

125 A hallmark of inflammatory gene induction is the activation of p65 via phosphorylation at serine  
126 536 (S536)<sup>27</sup>. Thus, we tested if 6B activated p65. Whole cell lysates from 2hrs post-challenge of HeLa  
127 GFP-p65 stable cell line were immunoblotted for p65 phosphorylation at S536 (Fig. 2A). In comparison  
128 to uninfected cells, both IL-1 $\beta$  (positive control) and challenge with 6B induced p65 phosphorylation of  
129 S536 ( $pV \leq 0.001$ ) whereas Tigr4 did not (Fig. 2B). To determine whether p65 activation by 6B had a role  
130 in its specific inflammatory signature, we used a chemical inhibitor of p65 activation, BAY 11-7082<sup>42-44</sup>.  
131 A549 cells were pretreated with 10 $\mu$ M BAY 11-7082 3hrs prior to 2hr challenge with 6B, Tigr4 or IL-1 $\beta$   
132 and gene expression in comparison to uninfected cells was determined by RT-PCR. BAY 11-7082  
133 treatment did not affect viability, or gene expression alone in comparison to untreated cells (Sup. Fig. 2A  
134 & B; gray bars). We determined expression levels for two genes significantly upregulated by 6B in

135 comparison to *Tigr4*, *IL-11* and *KDM6B*, as well as a control gene, *PTGS2*, which is known to be p65  
136 dependent. During 6B challenge no significant effect between untreated (no inhibitor) and DMSO  
137 (vehicle control) was observed upon the expression of *PTGS2*, *IL-11* and *KDM6B*, and under the same  
138 conditions *IL-11* and *KDM6B* expression remained roughly two-fold higher on average in comparison to  
139 *Tigr4* and IL-1 $\beta$  (Fig. 2C; white & light gray bars). In contrast, BAY 11-7082 inhibition of p65 during 6B,  
140 *Tigr4* or IL-1 $\beta$  challenge resulted in reduction in *PTGS2* across all samples (Fig. 2C; gray bars).  
141 Furthermore, the expression of *KDM6B* and *IL-11* were significantly repressed only during 6B challenge  
142 in the presence of inhibitor ( $pV \leq 0.001$  and 0.05 respectfully) in comparison to DMSO treated cells (Fig.  
143 2C; gray bars). These data show p65 activation is required for IL-11 and KDM6B expression upon 6B  
144 challenge of epithelial cells.

145 Previous studies demonstrated KDM6B interacts with p65 for inflammatory gene activation  
146 during keratinocyte wound healing, and ChIP-seq studies found LPS stimulation of macrophages lead to  
147 KDM6B regulation of specific inflammatory genes<sup>21,23</sup>. To determine whether KDM6B had an active role  
148 in 6B induced expression of *IL-11* and *KDM6B*, we used GSK-J4, an inhibitor of the catalytic JMJ domain  
149 of KDM6B<sup>45</sup>. As a control, we chose expression of *PTGS2*, as it is associated with KDM6B and not  
150 H3K27me3, thus inhibition of the catalytic activity of KDM6B should have no effect upon its expression  
151<sup>21</sup>. GSK-J4 (10 $\mu$ M; 24hrs prior) was used to pretreat A549 cells before challenge with 6B, *Tigr4* or IL-1 $\beta$ .  
152 GSK-J4 alone had no significant effect on cell viability, or gene expression in comparison to untreated  
153 cells, nor did it affect the transcripts of *PTGS2*, *IL-11* or *KDM6B* in *Tigr4* and IL-1 $\beta$  challenged cells (Fig. 2C  
154 and Sup. Fig. 2A & B; black bars). Whereas, when the catalytic activity of KDM6B was inhibited more  
155 than a three-fold loss of expression for both *IL-11* and *KDM6B* was observed during 6B challenge  
156 compared to DMSO control (Fig. 2C; black bars). GSK-J4 treatment had no effect upon *PTGS2* expression  
157 during 6B challenge, demonstrating KDM6B catalytic activity was specifically required for IL-11  
158 expression (Fig. 2C; black bars). With this, we clearly show catalytically active KDM6B is required for 6B  
159 induced expression of *IL-11* and *KDM6B*.

160

#### 161 6B induces chromatin remodeling of the IL-11 promoter for expression.

162 Since, KDM6B is a histone modifying enzyme localizing to chromatin, we addressed whether 6B  
163 induced expression of *IL-11* required chromatin remodeling within the IL-11 promoter. We mapped and  
164 designed ChIP-qPCR primers to predicted kappa-binding sites within the IL-11 promoter using AliBaba2  
165 software, which curates eukaryotic transcription factor DNA binding motifs from the TRANSFAC®  
166 database<sup>46</sup>. Three kappa-binding sites upstream (-2,077bp, -774bp, and -406bp) of the IL-11

167 transcriptional start site (TSS), and one site downstream (+83bp) were predicted (Fig. 3A). Herein, we  
168 obtained chromatin from A549 cells 2hrs post-challenge with either 6B, Tigr4, or IL-1 $\beta$ , and compared  
169 the recovery of p65, and KDM6B at these kappa-binding sites within the IL-11 promoter using ChIP-qPCR  
170 with and without chemical inhibition of the catalytic activity of KDM6B.

171 During 6B challenge there was a significant ( $pV \leq 0.001$ ) recovery of p65 at kappa-binding sites P6  
172 (~25%), P3 (~20%) and P2 (~10%) in contrast to uninfected conditions (Fig. 3B; 6B dark blue; uninfected  
173 white). Furthermore, there was ~15% recovery of KDM6B across the same kappa-binding sites in cells  
174 challenged with 6B (Fig. 3C; 6B dark blue; uninfected white). In contrast, there was no recruitment of  
175 p65 or KDM6B to the kappa-binding sites in IL-1 $\beta$  or Tigr4 challenged cells (Sup. Fig. 3B & C).  
176 Recruitment of p65 and KDM6B to these kappa-binding sites was abolished in the presence of the GSK-  
177 J4 inhibitor (Fig. 3B & C; 6B light blue; uninfected gray). This clearly showed during 6B challenge the  
178 promoter of IL-11 was rearranged in a manner requiring the catalytic activity of KDM6B.

179 It has been suggested, mainly through peptide studies, that the enzymatic target of KDM6B is  
180 primarily H3K27me3<sup>39,47</sup>. Thus, we hypothesized the chromatin rearrangement within the IL-11  
181 promoter was a result of KDM6B demethylation of H3K27me3. We used ChIP-qPCR to determine the  
182 levels of H3K27me3 and H3, for nucleosome occupancy, across the three kappa-binding sites within the  
183 IL-11 promoter. Surprisingly, H3K27me3 was not decreased, in fact there was a slight, but significant  
184 ( $pV \leq 0.05$ ), increase at the P6 kappa-binding site in comparison to unchallenged cells (Fig. 3D; 6B dark  
185 blue; uninfected white). There was no enrichment at any kappa-site during IL-1 $\beta$  or Tigr4 challenge  
186 (Sup. Fig. 3D). Furthermore, there were no differences in H3 nucleosome distribution at any of the  
187 kappa-binding sites between 6B and uninfected cells (Fig. 3E; 6B dark blue; uninfected white), this was  
188 also the case for cells challenged with IL-1 $\beta$  or Tigr4 (Sup. Fig. 3E). In the presence of GSK-J4 the increase  
189 of H3K27me3 at the P6 and P2 kappa-binding sites was lost in conjunction with a slight but significant  
190 increase in H3 nucleosome recovery at P6 (Fig. 3E & D; 6B light blue; uninfected gray). This data showed  
191 during 6B challenge KDM6B was not demethylating H3K27me3, and this mark seemed to increase across  
192 the promoter.

193 Since our data showed an active role for KDM6B enzymatic activity independent of H3K27me3,  
194 we tested another proposed substrate of KDM6B, H3K27me2<sup>38</sup>. Our ChIP results showed challenge with  
195 6B induced loss of H3K27me2 at the P6 ( $pV \leq 0.01$ ) and variable levels at the P3 and P2 sites within the IL-  
196 11 promoter in comparison to uninfected cells (Fig. 3F; 6B dark blue; uninfected white). Strikingly, when  
197 KDM6B enzymatic activity was blocked during 6B challenge demethylation of H3K27me2 was  
198 significantly inhibited across all kappa-binding sites (Fig. 3F; 6B light blue; uninfected gray).

199 Together these data show: 1) upon 6B challenge of epithelial cells the promoter of IL-11 is  
200 remodeled through the cooperative role of KDM6B and p65, and 2) KDM6B enzymatic activity is directed  
201 toward H3K27me2 and independent of H3K27me3 at these kappa-binding sites.

202

### 203 KDM6B and IL-11 contribute to epithelial cell integrity

204 We next wanted to address the role of KDM6B during 6B colonization of epithelial cells.  
205 Interestingly, previous works demonstrate KDM6B and p65 are both required for keratinocyte wound  
206 healing<sup>23</sup>. Using these findings coupled with our own data showing 6B induced KDM6B and p65  
207 recruitment to the IL-11 promoter in epithelial cells, we hypothesized that KDM6B and IL-11 were  
208 involved in maintaining epithelial cell integrity during pneumococcal colonization. In order to separate  
209 epithelial membrane permeability induced mainly by the pneumolysin toxin, a pore forming cholesterol  
210 dependent cytotoxin (CDC), from cell death, we coupled the LDH cytotoxicity assay with Trypan blue  
211 exclusion. Combining these assays allowed us to separate cells with only damaged plasma membranes,  
212 which are permissible to Trypan, from dead cells that also release lactate dehydrogenase<sup>48,49</sup>. Herein,  
213 we used Trypan blue exclusion and LDH cytotoxicity assays in the presence of KDM6B inhibitor GSK-J4  
214 (10 $\mu$ M) or DMSO (vehicle control) 24hrs prior to challenge with either Tigr4 or 6B (Fig. 4A). We observed  
215 no difference in either epithelial integrity or cell viability between uninfected cells with and without  
216 GSK-J4 inhibitor (Fig. 4B &E). Furthermore, epithelial integrity and viability was not compromised during  
217 6B challenge in comparison to uninfected cells (Fig. 4B &E). In contrast, challenge with Tigr4 resulted in  
218 ~60% epithelial membrane damage (Fig. 4B), and ~45% cell death (Fig. 4E). Strikingly, inhibition of  
219 KDM6B catalytic activity affected epithelial integrity of 6B challenged cells, there was a significant ~20%  
220 ( $pV \leq 0.001$ ) increase in plasma membrane permeability (Fig. 4B), and ~15% ( $pV \leq 0.01$ ) increase in LDH  
221 release in comparison to the respective controls (Fig. 4E). These results suggest KDM6B plays a role in  
222 cell integrity only upon 6B challenge.

223 Since KDM6B is necessary for both cell integrity and regulates *IL-11* expression, we further  
224 tested the role of IL-11 during pneumococcal colonization of epithelial cells. We next determined if  
225 exogenous recombinant human IL-11 was sufficient to rescue epithelial integrity loss seen during Tigr4  
226 challenge. At the time of challenge, the inoculums of Tigr4 and 6B were supplemented with  
227 recombinant human IL-11 prior to addition to A549 cells. After 2hrs Trypan blue exclusion and LDH  
228 release assays were performed (Fig. 4C-E). IL-11 at the time of Tigr4 challenge partially rescued cell  
229 integrity by ~20% ( $pV \leq 0.001$ ), in comparison to untreated controls (Fig. 4D). There was no significant  
230 effect of exogenous IL-11 on uninfected or 6B challenged cells (Fig. 4D). Furthermore, LDH release



231 showed exogenous IL-11 lowered Tigr4 cytotoxicity by ~15% ( $pV \leq 0.01$ ; Fig. 4E). Together this data  
232 shows IL-11 contributes to maintaining epithelial cell integrity during pneumococcal colonization.

233 Our data suggested the carriage isolate of serotype 6B induced KDM6B and IL-11 to maintain  
234 epithelial integrity. We hypothesized other pneumococcal carriage isolates could also induce *IL-11*  
235 expression, while invasive ones would not. To test this, we compared additional carriage isolates of  
236 either serotype 19A or 19F, and two invasive serotype 1 isolates harboring either a hemolytic or non-  
237 hemolytic pneumolysin allele. Isolates of serotype 19A and 19F upregulated *IL-11* expression in A549  
238 epithelial cells in comparison to uninfected cells, whereas the serotype 1 isolates did not (Fig. 4F). To  
239 determine if *IL-11* upregulation was specific to pneumococcal carriage isolates, or potentially  
240 upregulated by commensal organisms, we tested five additional oral microbiome commensals. Indeed,  
241 *Streptococcus gordonii*, *Streptococcus sanguinis*, *Streptococcus oralis*, *Eikenella corrodens* and  
242 *Fusobacterium nucleatum* also upregulated the expression of *IL-11* in immortalized gingival  
243 keratinocytes (Sup. Fig. 4A). Together, our data show pneumococcal carriage isolates and commensal  
244 organisms induce *IL-11* expression upon colonization, suggesting a common response is induced by  
245 colonizing bacteria. All together, we show pneumococcal carriage isolate 6B requires active KDM6B  
246 during *in vitro* colonization of human epithelial cells to mitigate epithelial cell damage, and IL-11 partially  
247 rescues epithelial cell integrity during Tigr4 challenge.

248

#### 249 KDM6B is essential for local containment of carriage of 6B *in vivo*

250 Having defined an essential role for KDM6B during serotype 6B colonization of epithelial cells *in*  
251 *vitro*, we hypothesized local inhibition of KDM6B during 6B colonization of the murine nasal epithelium  
252 would promote 6B to escape from the nasopharynx due to loss of epithelium integrity. We challenged  
253 mice with  $3 - 4 \times 10^6$  CFU of either 6B or Tigr4 mixed with either DMSO (vehicle control) or 5mM GSK-J4.  
254 The plated inoculums showed no significant effect of DMSO or GSK-J4 on bacterial viability (Sup. Fig. 5).  
255 Bacterial burden in the nasal lavage (NL), bronchoalveolar lavage fluid (BALF), lungs, and spleens of mice  
256 24 and 48hrs post-inoculation were quantified by conventional colony forming unit (CFU) enumeration  
257 (Fig. 5A & B). Bacterial burdens from 6B and Tigr4 challenged DMSO animals showed on average one log  
258 more bacteria across all organs in comparison to Tigr4 by 24hrs (Fig. 5A; 6B light blue; Tigr4 gray). By  
259 48hrs, infection with Tigr4 showed a progression of bacteria towards internal organs. The loosely  
260 attached bacteria in the NL and BALF decreased, while the burden in the lung and spleen increased in  
261 comparison to 24hrs. However, 6B CFU numbers either remained constant or decreased in all samples  
262 (Fig. 5B; 6B light blue). With this data we concluded 6B was primarily contained within the murine nasal

263 cavity, whereas by 48hrs post-inoculation Tigr4 had escaped the nasopharynx and begun to disseminate  
264 from the lungs.

265         However, the addition of GSK-J4 changed the bacterial distribution of 6B. Indeed, GSK-J4 treated  
266 animals challenged with 6B showed increased burden across all samples in comparison to the 6B DMSO  
267 control group at 24hrs (Fig. 5A). Additionally, the recovered bacteria from the NL and BALF in the GSK-J4  
268 6B challenged group was not significantly different to the Tigr4 DMSO group (Fig. 5A). However, after  
269 24hrs there was no significant difference in the recovery of Tigr4 from the NL, BALF, lungs or spleens  
270 between DMSO or GSK-J4 treated animals (Fig. 5A; Tigr4 DMSO white, Tigr4 GSK-J4 gray). By 48hrs post-  
271 challenge 6B GSK-J4 animals maintained a significantly ( $pV \leq 0.05$ ) high bacterial burden in the BALF  
272 compared to 6B DMSO treated animals (Fig. 5B; 6B DMSO light blue, 6B GSK-J4 dark blue). Importantly  
273 in animals treated with GSK-J4 6B was recovered from the spleen, an organ which bacteria were mostly  
274 undetected in DMSO control animals. GSK-J4 treated animals in the Tigr4 group also showed an increase  
275 in bacterial burden at 48hrs post-challenge in the NL, BALF, lung and spleen. Altogether, these data  
276 show KDM6B activity is specifically required for containment of 6B during colonization of the murine  
277 nasal cavity, and is potentially a negative regulator of Tigr4 dissemination.

278

279

## 280 **Discussion:**

281         Colonization of the nasopharynx is an essential process that precedes asymptomatic  
282 pneumococcal carriage or symptomatic pneumococcal disease, with the bacteria first encountering the  
283 epithelial barrier<sup>3,5</sup>. The molecular and transcriptional processes that define carriage at this stage are  
284 largely unknown. Towards this end, we completed a human microarray of A549 epithelial cells  
285 challenged with either 6B or Tigr4 pneumococcal strains. We show the pneumococcal carriage isolate 6B  
286 differentially regulated 388 genes, with a primary enrichment for NF- $\kappa$ B associated genes in comparison  
287 to Tigr4. A further study of NF- $\kappa$ B signaling demonstrated 6B activated p65, in contrast to Tigr4. Direct  
288 comparison of NF- $\kappa$ B regulated genes shows that 6B induced a unique inflammatory signature that  
289 included *KDM6B* and *IL-11* expression, in contrast to Tigr4. We demonstrate molecularly that carriage  
290 pneumococcus, through the activity of KDM6B, induces remodeling of the IL-11 promoter to reveal  
291 three NF- $\kappa$ B sites, which are not accessible during IL-1 $\beta$  or Tigr4 stimulation. Together, this is the first  
292 demonstration that pneumococcal carriage remodels chromatin within epithelial cells to support a  
293 unique inflammatory signature.

294 Our findings, in conjunction with recent works by *Weight et al.*, support the idea that  
295 pneumococcal carriage, in contrast to invasive pneumococcus, is actively inducing a host response to  
296 promote confinement to the nasopharynx<sup>15</sup>. Our results strongly suggest KDM6B and its regulation of  
297 IL-11 transcription are key components modulating the host-pneumococcal response during  
298 colonization by carriage and invasive *S. pneumoniae* strains. In both *in vivo* and *in vitro* experiments with  
299 chemical inhibition of KDM6B, we were able to interchange carriage and invasive phenotypes through a  
300 host driven mechanism. Since KDM6B differentially regulates multiple inflammatory genes we cannot  
301 rule out the possibility there are other genes with concurrent or synergistic functions with IL-11.  
302 However, our IL-11 rescue experiments with Tigr4 suggest a role for IL-11 in locally maintaining a  
303 permissive/tolerogenic epithelial-pneumococcal host response. Interestingly, IL-11 is known to influence  
304 mucus production, wound healing of gastric ulcers and resistance of endothelial cells to immune  
305 mediated injury<sup>50-53</sup>. Promoting the confinement of a carriage pneumococcal strains within the  
306 nasopharynx, is also reflected in our microarray data, as 52 genes associated with wound healing gene  
307 ontology were upregulated by 6B in comparison to Tigr4 (Sup. Table 1). Additionally, 39 of the 52  
308 upregulated wound healing genes were also associated with KDM6B and/or H3K27me3 determined  
309 from the ChIP-seq studies of macrophages (Sup. Table 1). Therefore, our findings suggest the initial  
310 pneumococcal-epithelial cell interaction plays an important role in driving a host response leading to  
311 divergent asymptomatic or symptomatic phenotypes during pneumococcal disease. Within this  
312 principal, we propose, in contrast to invasive serotypes, that early colonization of nasal epithelium by  
313 carriage serotypes actively induces “tolerogenic inflammation” through upregulation of wound healing  
314 cascades as a means to counter balance an early deleterious pro-inflammatory host response (i.e.  
315 neutrophil influx), thus preserving a prolonged niche within the host. Interestingly, we find that a  
316 signature gene, IL-11, was also induced by other pneumococcal carriage isolates and by several  
317 commensal organisms, suggesting this is a common response to colonizing bacteria.

318 The lysine demethylase KDM6B has mainly been characterized in cellular development, however  
319 a few studies suggest that this particular histone demethylase also fine-tunes inflammatory responses  
320 and wound healing downstream of p53 largely through unknown mechanisms<sup>21-24,54-56</sup>. We are the first  
321 to report both a biological and molecular role for KDM6B and H3K27me3/2 in regulation of a specific  
322 gene locus, IL-11, during bacterial colonization. Surprisingly, although KDM6B was shown to primarily  
323 target H3K27me3 and to a lesser extent H3K27me2<sup>38,39,47</sup>, our results suggest KDM6B is selectively  
324 demethylating H3K27me2 and not H3K27me3 at the IL-11 promoter. These results are consistent with  
325 previous observations of *Da Santa et al.*, who reported gene regulation by KDM6B independently of

326 H3K27me3<sup>21</sup>. With this observation, we hypothesize that KDM6B is differentially regulating  
327 inflammatory gene expression through selective demethylation of H3K27me2 through either an  
328 unknown regulatory element or posttranslational modifications to KDM6B. Future ChIP-seq and  
329 proteomic studies with biological stimuli, such as pneumococcus, will yield substantial insight into  
330 possible KDM6B complexes, and the dynamics of H3K27me3/2 in epigenetic control of inflammatory  
331 signaling cascades.

332 Through our study of p65 activation by pneumococcus, we find that serotype 6B activated p65  
333 to similar levels as IL-1 $\beta$ , however, the ensuing transcriptomic responses are very different. Combining  
334 these observations with active remodeling of the IL-11 promoter strongly suggests that under 6B  
335 stimulation there are additional p65 interacting partners or posttranslational modifications (PTMs), in  
336 conjunction with phosphorylation of serine 536. Such data would support a novel biological role for “NF-  
337  $\kappa$ B barcode hypothesis”, where a signature barcode of PTMs on NF- $\kappa$ B mediates a specific gene  
338 expression pattern<sup>57,58</sup>. While we have established a link between p65, KDM6B and *IL-11* expression,  
339 identification of the p65 PTMs and interacting partners necessary for the inflammatory signature of 6B  
340 will advance our understanding of not only carriage pneumococcal host responses, but also p65  
341 regulation during tolerogenic inflammatory responses.

342 A meta-analysis conducted by *Brouwer et al.*, highlighted single nucleotide polymorphisms  
343 (SNPs) associated with *NFKBIA*, *NFKBIE*, and *TIRAP* correlated with protection, whereas SNPs within  
344 NEMO (*IKBKG*) or IRAK4 associated predominantly with increased susceptibility to disease<sup>59</sup>. Analysis of  
345 KDM6B and H3K27me3 ChIP-seq data from LPS stimulated macrophages, shows these protective genes,  
346 *NFKBIA*, *NFKBIE*, and *TIRAP*, are also associated with KDM6B and/or H3K27me3, whilst NEMO and IRAK4  
347 are not<sup>21</sup>. Since *NFKBIA*, and *NFKBIE* are known to inhibit NF- $\kappa$ B through sequestration within the  
348 cytoplasm<sup>16,60,61</sup>, one could hypothesize KDM6B is a chromatin level negative regulator that balances  
349 inflammatory signaling in conjunction with p65 across a unique “p65-KDM6B” axis. In this context,  
350 KDM6B serves as the molecular “regulator or brake” responsible for modulating the host response  
351 based upon the severity, or degree of inflammatory signal input. This role is evidenced by our *in vivo*  
352 studies showing chemical inhibition of KDM6B *in vivo* results in hypervirulence of Tigr4 and the escape  
353 of a carriage serotype 6B isolate from the murine nasal cavity.

354 Overall, our data demonstrates the first biological role of KDM6B in bacterial colonization. We  
355 further reveal catalytically active KDM6B is required for host tolerance to pneumococcal carriage isolate  
356 6B. We further show exogenous IL-11 is partially sufficient to rescue Tigr4 induced cell damage *in vitro*.

357 While we have only begun to scratch the surface of the molecular pathways involved in this process, it is  
358 clear characterizing pneumococcal carriage can not only identify new means to combat pneumococcal  
359 disease, but reveal new mechanisms involved in commensal organism mediated inflammatory  
360 processes.

361

362

363 **Materials and Methods:**

364 Bacterial strains, growth conditions and CFU enumeration. Clinical isolates of serotypes 6B (ST90; CNRP#  
365 43494), 19A (ST276; CNRP# 45426) and 1 (non-hemolytic; ST306; CNRP# 43810) were obtained from the  
366 Centre National de Référence des Pneumocoques (Emmanuelle Varon; Paris, France). Serotype 19F  
367 (BHN100; ST162 Birgitta Henriques Normark, Karolinska Institutet <sup>62</sup>), serotype 4 Tigr4 (Thomas Kohler,  
368 Universität Greifswald), and serotype 1 (ST304 hemolytic; M. Mustapha Si-Tahar, Université de Tours).  
369 Experimental starters were prepared from frozen master stocks struck on 5% Columbia blood agar  
370 plates (Biomerieux Ref# 43041) and grown overnight at 37°C with 5% CO<sub>2</sub> prior to outgrowth in Todd-  
371 Hewitt (BD) broth supplemented with 50mM HEPES (Sigma) (TH+H) at 37°C with 5% CO<sub>2</sub> in closed falcon  
372 tubes. Midlog bacteria were pelleted, and diluted to 0.6OD<sub>600</sub> /mL in TH+H media supplemented with  
373 Luria-Bertani (BD) and 15% glycerol final concentration. Aliquots were made and frozen at -80°C for  
374 experiments. All experiments performed with frozen experimental starters of *S. pneumoniae* less than  
375 14 days old. For experiments, starters were grown to midlog phase in TH+H broth at 37°C with 5% CO<sub>2</sub>  
376 in closed falcon tubes, pelleted at 1,500xg for 10mins at room temperature (RT), washed in DPBS, and  
377 concentrated in 1mL DPBS prior to dilution at desired CFU/mL using 0.6OD<sub>600</sub> /mL conversion factors in  
378 either cell culture media or DPBS for animal studies (conversion factors Sup. Table 3). For  
379 paraformaldehyde (PFA) killed bacteria the concentrated bacteria prior to dilution was incubated 4%  
380 PFA for 30mins at RT, washed in DPBS, and diluted to desired CFU/mL using 0.6OD<sub>600</sub> /mL conversion  
381 factors. Bacteria CFU enumeration was determined by 96well dilution plating.

382  
383 Cell culture and *In vitro* challenge. A549 human epithelial cells (ATCC ref# CCL-185) were maintained in  
384 F12K media (Gibco) supplemented with 1x GlutaMax (Gibco) and 10% heat inactivated fetal calf serum  
385 (FCS) at 37°C with 5% CO<sub>2</sub>. Stable HeLa GFP-p65 were generated using the sleeping beauty system, and  
386 maintained in DMEM supplemented with 1x GlutaMax (Gibco) 10% heat inactivated FCS <sup>63</sup>. A549 or HeLa  
387 GFP-p65 cells used until passage 15. For *in vitro* challenge studies, A549 or HeLa GFP-p65 cells were  
388 plated in tissue culture treated plates at 2x10<sup>5</sup> cells (6well; for 72hrs), 5x10<sup>4</sup> cells (24well; for 48hrs), or  
389 1x10<sup>4</sup> cells (96well; for 48hrs). Bacterial inoculums diluted in cell culture media was added to cells, and  
390 bacterial-epithelial cell contact synchronized by centrifugation at 200xg for 10mins at RT, then moved to  
391 37°C with 5% CO<sub>2</sub> for 2hrs. For inhibitor studies, cell culture media was aspirated, and replaced with  
392 filter sterilized culture media containing inhibitor volume matched DMSO (Sigma), GSK-J4 (Sigma ref#  
393 SML0701), or BAY 11-7082 (Sigma ref# B5556) at 10µM final concentration for 24hrs or 3hrs respectively  
394 prior to bacterial addition. Human IL-11 (Miltenyi Biotec ref# 130-094-623) and human IL-1β (Enzo Life

395 Sciences ref# ALX-522-056) were used at 100 ng/mL and 10 ng/mL final concentration respectively in cell  
396 culture media.

397

398 Immunofluorescence and Trypan blue bright field microscopy. To quantify nuclear KDM6B, A549 cells  
399 were seeded on acid washed and UV treated coverslips in 24well plates as described above, 2hrs post-  
400 challenge media was aspirated, cells washed in DPBS, and fixed with 2.5% PFA for 10mins at RT.  
401 Coverslips were blocked and permeabilized overnight in 5% BSA 0.5% Tween20. Coverslips were  
402 incubated for 1hr at RT with KDM6B (1:500; abcam ref# ab38113) diluted in 5% BSA 0.5% Tween20,  
403 washed in 0.5% Tween20, and incubated for 1hr with Alexa Fluor 488 secondary. After secondary,  
404 coverslips were washed in 0.5% Tween20 and mounted using Prolong Gold with DAPI (Invitrogen).  
405 Confocal microscopy images were acquired on a Ziess axio observer sinning disk confocal. Nuclear  
406 KDM6B intensity per cell was quantified within an ROI generated from the DAPI signal in Fiji <sup>64</sup>. For  
407 Trypan exclusion microscopy, A549 cells were seeded in 96well plates as described above. 2hrs post-  
408 challenge culture media was aspirated, cells washed in DPBS, and Trypan blue (Thermo) added for  
409 10mins at RT. Trypan blue was removed, and cells fixed with 2.5% PFA for 10mins at RT. PFA was  
410 removed and fixed cells washed in DPBS prior to imaging on a EVOS FL (Thermo). Trypan positive cells  
411 were scored manually as % of total cells in an imaged field.

412

413 A549 epithelial microarray. A549 cells were infected as described above, and total RNA harvested using  
414 RNeasy kit (Qiagen). RNA quality was confirmed using a Bioanalyzer (Agilent). Affymetrix GeneChip  
415 human transcriptome array 2.0 was processed as per manufacturer's instructions. Data was analyzed  
416 using TAC 4.0 (Applied Biosystems).

417

418 LDH assay. LDH assays were performed on cell culture supernatants as per manufacturer's instructions  
419 (Pierce LDH cytotoxicity kit (Thermo ref# 88953). LDH absorbance was read using Cytation 5 (BioTek) at  
420 manufacturer's recommended excitation and emissions.

421

422 ChIP and ChIP-qPCR. Detailed ChIP buffer components are in supplemental methods. In brief,  $8 \times 10^6$   
423 A549 cells were cross-linked in tissue culture plates with 1% formaldehyde for 10mins at RT, then  
424 quenched with 130mM glycine for 5mins at RT. Cells were washed in DPBS, gently scraped, and  
425 transferred to an eppendorf. Harvested cells were pelleted at 200xg, supernatant aspirated and frozen -  
426 20°C. To obtain chromatin, cell pellets were thawed on ice and lysed for 30mins on ice in nuclear

427 isolation buffer supplemented with 0.2% Triton X-100. Nuclei pelleted, supernatant aspirated and  
428 suspended in chromatin shearing buffer for sonication with a Bioruptor (Diagenode) to 200-900bp size.  
429 Sheared chromatin was cleared by centrifugation, then sampled for size using 2% agarose gel  
430 electrophoresis and quantification using Pico488 (Lumiprobe ref# 42010). ChIP grade antibodies to p65  
431 (L8F6) (CST ref #6956), KDM6B (abcam ref# ab38113), H3K27me3 (abcam ref# ab6002), H3 (abcam ref#  
432 ab195277), or H3K27me2 (diagenode ref# C15410046-10) were used at manufacturer's recommended  
433 concentrations and bound to DiaMag beads (diagenode ref # C03010021-150) overnight with gentle  
434 rotation. Quantified chromatin was diluted to 10 $\mu$ g per immunoprecipitation condition was added to  
435 antibody bound DiaMag beads overnight with gentle rotation. Beads were washed with buffers 1-6  
436 (supplemental methods), decrosslinked by boiling for 10mins with 10% Chelex, treated with RNase and  
437 proteinase K, then purified using phenol-chloroform extraction followed by isopropanol precipitation.  
438 Recovered DNA was suspend in molecular grade water, and 1 $\mu$ L used for Sybr Green reactions as per  
439 manufacturer's instructions on a BioRad CFX384 (BioRad). % recovery was calculated as 2 raised to the  
440 adjusted input Ct minus IP Ct multiplied by 100. For histone marks, H3K27me3/2, the % recovery was  
441 normalized to the % recovery of H3. qPCR primers listed in Sup. Table 3.

442  
443 RNA isolation and RT-PCR. Total RNA isolated using TRIzol (Life technologies ref#15596-026) extraction  
444 method as per manufacturer's recommendations. Recovered RNA was suspended in molecular grade  
445 water, nano dropped and 5 $\mu$ g converted to cDNA using Super Script IV as per manufacturer's  
446 instructions. cDNA was diluted to 20ng/ $\mu$ L in molecular grade water and 1 $\mu$ L used for Sybr Green  
447 reactions as per manufacturer's instructions on a BioRad CFX384 (BioRad). RT-PCR primers listed in Sup.  
448 Table 3. Relative expression was calculated by  $\Delta\Delta$ Ct method to *GapDH*<sup>65</sup>.

449  
450 Immunoblots and quantification. Cell culture media was removed, washed in DPBS and whole cell  
451 lysates harvested with Laemmli buffer<sup>66</sup>. Lysates were boiled 10min, and frozen at -20°C. Whole cell  
452 lysates were ran on 8% polyacrylamide SDS PAGE gels, transferred to PVDF membrane (BioRad), blocked  
453 in 5% BSA, then probed for p65 (CST ref #6956), p65 phosphorylation at serine 536 (CST ref# 3033), or  
454 actin AC-15 monoclonal (sigma ref# A5441) as per manufacturer's recommendations. Appropriate  
455 secondary-HRP conjugated antibodies were used with clarity ECL (BioRad) developing reagents.  
456 Membranes were developed on ChemiDoc Touch (BioRad).

457



458 *In vivo* animal studies. All protocols for animal experiments were reviewed and approved by the CETEA  
459 (Comité d'Ethique pour l'Expérimentation Animale - Ethics Committee for Animal Experimentation) of  
460 the Institut Pasteur under approval number Dap170005 and were performed in accordance with  
461 national laws and institutional guidelines for animal care and use. Wildtype C57BL/6 female 8-9 week  
462 old mice were purchased from Janvier Labs (France). Animals were anesthetized with a ketamine and  
463 xylazine cocktail prior to intranasal challenge with 20 $\mu$ L of 3 - 4x10<sup>6</sup> CFU of Tigr4 or 6B. Bacterial  
464 inoculums were made as described above with minor modification. In brief, after 0.6OD<sub>600</sub> bacterial  
465 were concentrated and diluted in either filter sterilized DMSO/DPBS or 5mM GSK-J4/DPBS. 24 and 48hrs  
466 post-inoculation animals were euthanized by CO<sub>2</sub> affixation. The nasal lavage was obtained by blocking  
467 the oropharynx, to avoid leakage into the oral cavity and lower airway, and nares flushed with 500 $\mu$ L  
468 DPBS. Bronchoalveolar lavage fluid (BALF), lungs, and spleens were collected and placed in 1mL DPBS  
469 supplemented with 2x protease inhibitor cocktail (Sigma ref # P1860 ). CFU were enumerated as  
470 described above on 5 $\mu$ g/mL Gentamicin Columbia Blood agar selection plates.

471  
472 Statistical analysis. All experiments, unless otherwise noted, were repeated 2-4 times with the statistical  
473 test in figure legends. *P* values were calculated using GraphPad Prism software. For RT-PCR all statistics  
474 were calculated on either the  $\Delta\Delta$ Ct or  $\Delta$ Ct depending on the desired comparison. PCA plots using the  
475 "prcomp" function of the base stats package in R on scaled and mean centered log<sub>2</sub> transformed data.  
476 Microscopy data was collected from analysis of 20-50 cells for nuclear staining, or 200-300 cells for  
477 brightfield per biological replicate per group. Animal studies used the minimum number of animals  
478 required to reach power based on post-hoc CFU analysis calculated using G\*Power software.

479

480 **Supplemental Methods:**

481 AlamarBlue cytotoxicity. A549 cell viability was determined using AlamarBlue (Thermo ref# DAL1025) as  
 482 previously described<sup>67</sup>. AlamarBlue absorbance was read using Cytation 5 (BioTek) at manufacturer's  
 483 recommended excitation and emissions.

484

485 Oral commensal *in vitro* infection and RT-PCR.

486

487 ChIP buffer solutions as follows:

| Nuclear Isolation Buffer (NIB)    | Chromatin shearing buffer (Buffer C) | SDS dilution buffer (buffer D)    |
|-----------------------------------|--------------------------------------|-----------------------------------|
| 15mM Tris pH 7.5                  | 1% SDS                               | 0.6% Triton X-100                 |
| 60mM KCl                          | 10mM Tris HCL pH 8.0                 | 0.06% NaDOC                       |
| 15mM NaCl <sub>2</sub>            | 1mM EDTA                             | 150mM NaCl                        |
| 250mM sucrose                     | 0.5mM EGTA                           | 12mM Tris HCL pH 8.0              |
| 1mM CaCl <sub>2</sub>             |                                      | 1mM EDTA                          |
| 5mM MgCl <sub>2</sub>             |                                      | 0.5mM EGTA                        |
| Day of use                        | Day of use                           | Day of use                        |
| 1x PhosSTOP                       | 1x PhosSTOP                          | 1x PhosSTOP                       |
| 10mM Sodium Butyrate              | 10mM Sodium Butyrate                 | 10mM Sodium Butyrate              |
| 0.2mM PMSF                        | 0.2mM PMSF                           | 0.2mM PMSF                        |
| 1x protease cocktail              | 1x protease cocktail                 | 1x protease cocktail              |
| 1x phosphatase inhibitor cocktail | 1x phosphatase inhibitor cocktail    | 1x phosphatase inhibitor cocktail |

488

| 10% Chelex                  | 1.25M pH 7.6 Glycine buffer          |
|-----------------------------|--------------------------------------|
| 10g into 100mL milliQ water | 46.91g Glycine in 400mL milliQ water |
|                             | pH adjusted to 7.6 and QC to 500mL   |

489

490

491

| Wash buffer 1 (isotonic)           | Wash buffer 2<br>(isotonic, ionic charge change) | Wash buffer 3 (high salt dilution) |
|------------------------------------|--------------------------------------------------|------------------------------------|
| 1% Triton X-100                    | 0.5% NP40                                        | 0.7% Triton X-100                  |
| 0.1% NaDOC                         | 0.5% Triton X-100                                | 0.1% NaDOC                         |
| 150mM NaC                          | 0.5% NaDOC                                       | 250mM NaCl                         |
| 10mM Tris HCL pH 8.0               | 150mM NaCl                                       | 10mM Tris HCL pH 8.0               |
|                                    | 10mM Tris HCL pH 8.0                             |                                    |
| Wash buffer 4 (high salt dilution) | Wash buffer 5 (salt dilution)                    | Wash buffer 6 (TE)                 |
| 0.5% NP40                          | 0.1% NP40                                        | 20mM Tris HCL pH 8.0               |
| 0.5% Triton X-100                  | 150mM NaCl                                       | 1mM EDTA                           |
| 250mM LiCl                         | 20mM Tris HCL pH 8.0                             |                                    |
| 20mM Tris HCL pH 8.0               | 1mM EDTA                                         |                                    |
| 1mM EDTA                           |                                                  |                                    |



493 **References:**

- 494 1 Donkor, E. S. Understanding the pneumococcus: transmission and evolution. *Frontiers in cellular*  
495 *and infection microbiology* **3**, 7-7, doi:10.3389/fcimb.2013.00007 (2013).
- 496 2 Shak, J. R., Vidal, J. E. & Klugman, K. P. Influence of bacterial interactions on pneumococcal  
497 colonization of the nasopharynx. *Trends in microbiology* **21**, 129-135,  
498 doi:10.1016/j.tim.2012.11.005 (2013).
- 499 3 Weiser, J. N., Ferreira, D. M. & Paton, J. C. Streptococcus pneumoniae: transmission,  
500 colonization and invasion. *Nature reviews. Microbiology* **16**, 355-367, doi:10.1038/s41579-018-  
501 0001-8 (2018).
- 502 4 Pneumococcal vaccines WHO position paper--2012. *Releve epidemiologique hebdomadaire* **87**,  
503 129-144 (2012).
- 504 5 Bogaert, D., De Groot, R. & Hermans, P. W. Streptococcus pneumoniae colonisation: the key to  
505 pneumococcal disease. *Lancet Infect Dis* **4**, 144-154, doi:10.1016/s1473-3099(04)00938-7  
506 (2004).
- 507 6 Henriques-Normark, B., Blomberg, C., Dagerhamn, J., Battig, P. & Normark, S. The rise and fall of  
508 bacterial clones: Streptococcus pneumoniae. *Nat Rev Micro* **6**, 827-837 (2008).
- 509 7 Kadioglu, A., Weiser, J. N., Paton, J. C. & Andrew, P. W. The role of Streptococcus pneumoniae  
510 virulence factors in host respiratory colonization and disease. *Nature reviews. Microbiology* **6**,  
511 288-301, doi:10.1038/nrmicro1871 (2008).
- 512 8 Jochems, S. P., Weiser, J. N., Malley, R. & Ferreira, D. M. The immunological mechanisms that  
513 control pneumococcal carriage. *PLoS pathogens* **13**, e1006665-e1006665,  
514 doi:10.1371/journal.ppat.1006665 (2017).
- 515 9 Prevention, U. S. D. o. H. a. H. S. C. f. D. C. a. (ed U.S. Department of Health and Human  
516 Services & Centers for Disease Control and Prevention) 114 (CDC, CDC, 2013).
- 517 10 Ferreira, D. M. *et al.* Controlled human infection and rechallenge with Streptococcus  
518 pneumoniae reveals the protective efficacy of carriage in healthy adults. *American journal of*  
519 *respiratory and critical care medicine* **187**, 855-864, doi:10.1164/rccm.201212-2277OC (2013).
- 520 11 Weiser, J. N. The pneumococcus: why a commensal misbehaves. *Journal of molecular medicine*  
521 *(Berlin, Germany)* **88**, 97-102, doi:10.1007/s00109-009-0557-x (2010).
- 522 12 Quinton, L. J. & Mizgerd, J. P. Dynamics of lung defense in pneumonia: resistance, resilience, and  
523 remodeling. *Annual review of physiology* **77**, 407-430, doi:10.1146/annurev-physiol-021014-  
524 071937 (2015).
- 525 13 Henriques-Normark, B. & Tuomanen, E. I. The Pneumococcus: Epidemiology, Microbiology, and  
526 Pathogenesis. *Cold Spring Harbor perspectives in medicine* **3**, a010215,  
527 doi:10.1101/cshperspect.a010215 (2013).
- 528 14 Robson, R. L., Reed, N. A. & Horvat, R. T. Differential activation of inflammatory pathways in  
529 A549 type II pneumocytes by Streptococcus pneumoniae strains with different adherence  
530 properties. *BMC infectious diseases* **6**, 71, doi:10.1186/1471-2334-6-71 (2006).
- 531 15 Weight, C. M. *et al.* Microinvasion by Streptococcus pneumoniae induces epithelial innate  
532 immunity during colonisation at the human mucosal surface. *Nature communications* **10**, 3060,  
533 doi:10.1038/s41467-019-11005-2 (2019).
- 534 16 Ghosh, S. & Hayden, M. S. New regulators of NF-kappaB in inflammation. *Nature reviews.*  
535 *Immunology* **8**, 837-848, doi:10.1038/nri2423 (2008).
- 536 17 Bhatt, D. & Ghosh, S. Regulation of the NF-kappaB-Mediated Transcription of Inflammatory  
537 Genes. *Frontiers in immunology* **5**, 71, doi:10.3389/fimmu.2014.00071 (2014).

- 538 18 Dong, J., Jimi, E., Zhong, H., Hayden, M. S. & Ghosh, S. Repression of gene expression by  
539 unphosphorylated NF-kappaB p65 through epigenetic mechanisms. *Genes & development* **22**,  
540 1159-1173, doi:10.1101/gad.1657408 (2008).
- 541 19 Fujioka, S. *et al.* NF-kappaB and AP-1 connection: mechanism of NF-kappaB-dependent  
542 regulation of AP-1 activity. *Molecular and cellular biology* **24**, 7806-7819,  
543 doi:10.1128/MCB.24.17.7806-7819.2004 (2004).
- 544 20 Das, N. D., Jung, K. H. & Chai, Y. G. The role of NF-kappaB and H3K27me3 demethylase, Jmjd3,  
545 on the anthrax lethal toxin tolerance of RAW 264.7 cells. *PLoS one* **5**, e9913,  
546 doi:10.1371/journal.pone.0009913 (2010).
- 547 21 De Santa, F. *et al.* Jmjd3 contributes to the control of gene expression in LPS-activated  
548 macrophages. *Embo J* **28**, 3341-3352, doi:10.1038/emboj.2009.271 (2009).
- 549 22 De Santa, F. *et al.* The histone H3 lysine-27 demethylase Jmjd3 links inflammation to inhibition  
550 of polycomb-mediated gene silencing. *Cell* **130**, 1083-1094, doi:10.1016/j.cell.2007.08.019  
551 (2007).
- 552 23 Na, J. *et al.* Histone H3K27 Demethylase JMJD3 in Cooperation with NF-kB Regulates  
553 Keratinocyte Wound Healing. *Journal of Investigative Dermatology* **136**, 847-858,  
554 doi:<https://doi.org/10.1016/j.jid.2015.11.029> (2016).
- 555 24 Salminen, A., Kaarniranta, K., Hiltunen, M. & Kauppinen, A. Histone demethylase Jumonji D3  
556 (JMJD3/KDM6B) at the nexus of epigenetic regulation of inflammation and the aging process.  
557 *Journal of molecular medicine (Berlin, Germany)* **92**, 1035-1043, doi:10.1007/s00109-014-1182-x  
558 (2014).
- 559 25 Diermeier, S. *et al.* TNF $\alpha$  signalling primes chromatin for NF-kB binding and induces rapid and  
560 widespread nucleosome repositioning. *Genome biology* **15**, 536, doi:10.1186/s13059-014-0536-  
561 6 (2014).
- 562 26 Lone, I. N. *et al.* Binding of NF-kB to Nucleosomes: Effect of Translational Positioning,  
563 Nucleosome Remodeling and Linker Histone H1. *PLoS genetics* **9**, e1003830,  
564 doi:10.1371/journal.pgen.1003830 (2013).
- 565 27 Christian, F., Smith, E. L. & Carmody, R. J. The Regulation of NF-kB Subunits by Phosphorylation.  
566 *Cells* **5**, 12, doi:10.3390/cells5010012 (2016).
- 567 28 Oeckinghaus, A. & Ghosh, S. The NF-kB Family of Transcription Factors and Its Regulation. *Cold*  
568 *Spring Harbor perspectives in biology* **1**, a000034, doi:10.1101/cshperspect.a000034 (2009).
- 569 29 Wong, D. *et al.* Extensive characterization of NF-kB binding uncovers non-canonical motifs and  
570 advances the interpretation of genetic functional traits. *Genome biology* **12**, R70-R70,  
571 doi:10.1186/gb-2011-12-7-r70 (2011).
- 572 30 Avvakumov, N., Nourani, A. & Côté, J. Histone Chaperones: Modulators of Chromatin Marks.  
573 *Molecular cell* **41**, 502-514, doi:<https://doi.org/10.1016/j.molcel.2011.02.013> (2011).
- 574 31 Bannister, A. J. & Kouzarides, T. Regulation of chromatin by histone modifications. *Cell research*  
575 **21**, 381-395, doi:10.1038/cr.2011.22 (2011).
- 576 32 Black, J. C. & Whetstine, J. R. Chromatin landscape: Methylation beyond transcription.  
577 *Epigenetics* **6**, 13-19, doi:10.4161/epi.6.1.13331 (2011).
- 578 33 Hammond, C. M., Stromme, C. B., Huang, H., Patel, D. J. & Groth, A. Histone chaperone  
579 networks shaping chromatin function. *Nature reviews. Molecular cell biology* **18**, 141-158,  
580 doi:10.1038/nrm.2016.159 (2017).
- 581 34 Kouzarides, T. Chromatin modifications and their function. *Cell* **128**, 693-705,  
582 doi:10.1016/j.cell.2007.02.005 (2007).
- 583 35 Lorch, Y. & Kornberg, R. D. Chromatin-remodeling and the initiation of transcription. *Quarterly*  
584 *reviews of biophysics* **48**, 465-470, doi:10.1017/s0033583515000116 (2015).

- 585 36 Markolovic, S. *et al.* Structure–function relationships of human JmJc oxygenases—demethylases  
586 versus hydroxylases. *Current Opinion in Structural Biology* **41**, 62-72,  
587 doi:<https://doi.org/10.1016/j.sbi.2016.05.013> (2016).
- 588 37 Burchfield, J. S., Li, Q., Wang, H. Y. & Wang, R.-F. JMJD3 as an epigenetic regulator in  
589 development and disease. *The international journal of biochemistry & cell biology* **67**, 148-157,  
590 doi:10.1016/j.biocel.2015.07.006 (2015).
- 591 38 Hong, S. *et al.* Identification of JmJc domain-containing UTX and JMJD3 as histone H3 lysine 27  
592 demethylases. *Proceedings of the National Academy of Sciences of the United States of America*  
593 **104**, 18439-18444, doi:10.1073/pnas.0707292104 (2007).
- 594 39 Xiang, Y. *et al.* JMJD3 is a histone H3K27 demethylase. *Cell research* **17**, 850-857,  
595 doi:10.1038/cr.2007.83 (2007).
- 596 40 Satoh, T. *et al.* The Jmjd3-lrf4 axis regulates M2 macrophage polarization and host responses  
597 against helminth infection. *Nature immunology* **11**, 936-944, doi:10.1038/ni.1920 (2010).
- 598 41 Chao, Y. & Zhang, T. Optimization of fixation methods for observation of bacterial cell  
599 morphology and surface ultrastructures by atomic force microscopy. *Applied microbiology and*  
600 *biotechnology* **92**, 381-392, doi:10.1007/s00253-011-3551-5 (2011).
- 601 42 Pierce, J. W. *et al.* Novel inhibitors of cytokine-induced I $\kappa$ B phosphorylation and  
602 endothelial cell adhesion molecule expression show anti-inflammatory effects in vivo. *The*  
603 *Journal of biological chemistry* **272**, 21096-21103 (1997).
- 604 43 Karin, M. The beginning of the end: I $\kappa$ B kinase (IKK) and NF- $\kappa$ B activation. *The Journal*  
605 *of biological chemistry* **274**, 27339-27342 (1999).
- 606 44 Gilmore, T. D. The Rel/NF- $\kappa$ B signal transduction pathway: introduction. *Oncogene* **18**,  
607 6842-6844, doi:10.1038/sj.onc.1203237 (1999).
- 608 45 Kruidenier, L. *et al.* A selective jumonji H3K27 demethylase inhibitor modulates the  
609 proinflammatory macrophage response. *Nature* **488**, 404, doi:10.1038/nature11262  
610 <https://www.nature.com/articles/nature11262#supplementary-information> (2012).
- 611 46 Wingender, E. Compilation of transcription regulating proteins. *Nucleic acids research* **16**, 1879-  
612 1902, doi:10.1093/nar/16.5.1879 (1988).
- 613 47 Agger, K. *et al.* UTX and JMJD3 are histone H3K27 demethylases involved in HOX gene regulation  
614 and development. *Nature* **449**, 731-734, doi:10.1038/nature06145 (2007).
- 615 48 Walev, I. *et al.* Resealing of large transmembrane pores produced by streptolysin O in nucleated  
616 cells is accompanied by NF- $\kappa$ B activation and downstream events. *FASEB journal : official*  
617 *publication of the Federation of American Societies for Experimental Biology* **16**, 237-239,  
618 doi:10.1096/fj.01-0572fje (2002).
- 619 49 Tran, S.-L., Puhar, A., Ngo-Camus, M. & Ramarao, N. Trypan blue dye enters viable cells  
620 incubated with the pore-forming toxin HlyII of *Bacillus cereus*. *PloS one* **6**, e22876-e22876,  
621 doi:10.1371/journal.pone.0022876 (2011).
- 622 50 Nishina, T. *et al.* Interleukin-11 links oxidative stress and compensatory proliferation. *Sci Signal*  
623 **5**, ra5, doi:10.1126/scisignal.2002056 (2012).
- 624 51 Wen, C.-Y. *et al.* IL-11 up-regulates Tie-2 expression during the healing of gastric ulcers in rats.  
625 *World journal of gastroenterology* **9**, 788-790, doi:10.3748/wjg.v9.i4.788 (2003).
- 626 52 Mahboubi, K., Biedermann, B. C., Carroll, J. M. & Pober, J. S. IL-11 Activates Human Endothelial  
627 Cells to Resist Immune-Mediated Injury. *The Journal of Immunology* **164**, 3837-3846,  
628 doi:10.4049/jimmunol.164.7.3837 (2000).
- 629 53 Lee, C. G. *et al.* Endogenous IL-11 signaling is essential in Th2- and IL-13-induced inflammation  
630 and mucus production. *American journal of respiratory cell and molecular biology* **39**, 739-746,  
631 doi:10.1165/rcmb.2008-0053OC (2008).

- 632 54 Ohguchi, H. *et al.* KDM6B modulates MAPK pathway mediating multiple myeloma cell growth  
633 and survival. *Leukemia* **31**, 2661, doi:10.1038/leu.2017.141
- 634 <https://www.nature.com/articles/leu2017141#supplementary-information> (2017).
- 635 55 Chen, S. *et al.* The histone H3 Lys 27 demethylase JMJD3 regulates gene expression by impacting  
636 transcriptional elongation. *Genes & development* **26**, 1364-1375, doi:10.1101/gad.186056.111  
637 (2012).
- 638 56 Young, M. D. *et al.* ChIP-seq analysis reveals distinct H3K27me3 profiles that correlate with  
639 transcriptional activity. *Nucleic acids research* **39**, 7415-7427, doi:10.1093/nar/gkr416 (2011).
- 640 57 Moreno, R., Sobotzik, J.-M., Schultz, C. & Schmitz, M. L. Specification of the NF- $\kappa$ B transcriptional  
641 response by p65 phosphorylation and TNF-induced nuclear translocation of IKK $\epsilon$ . *Nucleic acids*  
642 *research* **38**, 6029-6044, doi:10.1093/nar/gkq439 (2010).
- 643 58 Collins, P. E., Mitxitorena, I. & Carmody, R. J. The Ubiquitination of NF- $\kappa$ B Subunits in the Control  
644 of Transcription. *Cells* **5**, 23, doi:10.3390/cells5020023 (2016).
- 645 59 Brouwer, M. C. *et al.* Host genetic susceptibility to pneumococcal and meningococcal disease: a  
646 systematic review and meta-analysis. *Lancet Infect Dis* **9**, 31-44, doi:10.1016/s1473-  
647 3099(08)70261-5 (2009).
- 648 60 Li, Z. & Nabel, G. J. A new member of the I kappaB protein family, I kappaB epsilon, inhibits RelA  
649 (p65)-mediated NF-kappaB transcription. *Molecular and cellular biology* **17**, 6184-6190,  
650 doi:10.1128/mcb.17.10.6184 (1997).
- 651 61 Scherer, D. C., Brockman, J. A., Chen, Z., Maniatis, T. & Ballard, D. W. Signal-induced degradation  
652 of I kappa B alpha requires site-specific ubiquitination. *Proceedings of the National Academy of*  
653 *Sciences of the United States of America* **92**, 11259-11263, doi:10.1073/pnas.92.24.11259  
654 (1995).
- 655 62 Sandgren, A. *et al.* Virulence in mice of pneumococcal clonal types with known invasive disease  
656 potential in humans. *The Journal of infectious diseases* **192**, 791-800, doi:10.1086/432513  
657 (2005).
- 658 63 Kowarz, E., Loscher, D. & Marschalek, R. Optimized Sleeping Beauty transposons rapidly  
659 generate stable transgenic cell lines. *Biotechnology journal* **10**, 647-653,  
660 doi:10.1002/biot.201400821 (2015).
- 661 64 Schindelin, J. *et al.* Fiji: an open-source platform for biological-image analysis. *Nature methods* **9**,  
662 676-682, doi:10.1038/nmeth.2019 (2012).
- 663 65 Livak, K. J. & Schmittgen, T. D. Analysis of relative gene expression data using real-time  
664 quantitative PCR and the 2(-Delta Delta C(T)) Method. *Methods (San Diego, Calif.)* **25**, 402-408,  
665 doi:10.1006/meth.2001.1262 (2001).
- 666 66 Laemmli, U. K. Cleavage of Structural Proteins during the Assembly of the Head of Bacteriophage  
667 T4. *Nature* **227**, 680-685, doi:10.1038/227680a0 (1970).
- 668 67 Connor, M. G. *et al.* Yersinia pestis Targets the Host Endosome Recycling Pathway during the  
669 Biogenesis of the Yersinia Containing Vacuole To Avoid Killing by Macrophages. *mBio* **9**, e01800-  
670 01817, doi:10.1128/mBio.01800-17 (2018).

671

672

673 **Author Contributions:**

674           Conceived and designed all experiments: MGC and MAH. Performed experiments: MGC, EP  
675 (KDM6B microscopy and HeLa GFP-p65 western blot), and OR (animal studies). Analyzed data: MGC and  
676 EP. DPM performed all oral commensal infections and RT-PCR. LB generated the stable HeLa GFP-p65  
677 cell line under the supervision of JE. MGC wrote the original manuscript draft. MGC and MAH edited and  
678 reviewed the manuscript. MAH supervised the research. All authors approved the final manuscript.

679

680 **Acknowledgments:**

681           We would like to thank Emmanuelle Varon, Birgitta Henriques Normark, M. Mustapha Si-Tahar,  
682 and Thomas Kohler for their generous gifts of *S. pneumoniae* strains. We are thankfully Gregory Dore  
683 (Institut Pasteur, Nuclear Organization and Oncogenesis Group – Oliver Bischof) for processing the  
684 microarray Affymetrix GeneChips. Biostatistics and R discussions with Jose Nabuco (Institute Pasteur)  
685 and Jeremy Camp (University of Veterinary Medicine Vienna) were greatly appreciated. Michael G.  
686 Connor is support by the Pasteur Foundation Fellowship. G5 Chromatin and infection is support by the  
687 Institut Pasteur, and the Agence National de la Recherche (ANREpiBActIn).

688

689 **Conflict of interest statement:**

690 The authors declare no conflict of interest.

691



692 **Figure Legends and Tables:**

693 **Figure 1: Carriage serotype 6B induces a unique inflammatory signature.** Human microarray of epithelial  
694 A549 cells 2hrs post-challenge (MOI 20) with either 6B (blue) or Tigr4 (gray). Circled 6B genes are NF- $\kappa$ B  
695 associated. A) All genes differentially regulated by  $\pm 1.5$  fold-change to uninfected condition. B)  
696 Comparison of genes identified by microarray containing NF- $\kappa$ B sites between 6B and Tigr4. C) RT-PCR  
697 validation of inflammatory genes from cells collected 2hrs post-challenge with either Tigr4 or 6B. Heat  
698 map represents fold change to uninfected condition (n=4). Student's T-Test 6B to Tigr4, \*=  $pV \leq 0.05$ . IL-  
699 11 and KDM6B highlighted in red are unique to 6B dataset. D) Principal component analysis of  
700 inflammatory RT-PCR panel (n=4) comparing IL-1 $\beta$  (red), Tigr4 (gray) and 6B (blue). Biplot of the mean  
701 centered and  $\log_2$  transformed expression data using the first two components and 60% concentration  
702 ellipses around each group. E) Quantification of immunofluorescence microscopy of A549 cells 2hrs  
703 post-challenge with either Tigr4, 6B or paraformaldehyde fixed 6B for nuclear staining of KDM6B  
704 normalized to DAPI (n=4; 20-50 cells per replicate and group). Tukey box and whisker plot. One way-  
705 ANOVA with Tukey's multiple comparison post-hoc test, \*\*\*=  $pV \leq 0.001$ .

706

707 **Figure 2: Expression of KDM6B and IL-11 is specific to 6B and requires p65 activation.** Immunoblot of  
708 stable HeLa p65-GFP expressing cells. Whole cell lysates 2hrs post-challenge with either IL-1 $\beta$  (10  
709 ng/mL), Tigr4 (MOI 20), or 6B (MOI 20) and probed for p65, phosphorylated p65 at Serine 536 and actin.  
710 A) Representative image of immunoblot. B) Actin normalized ratio phos-p65 S536 to total p65 (n=3). Bar  
711 graph  $\pm$  STD. One way-ANOVA with Tukey's multiple comparison post-hoc test, \*\*=  $pV \leq 0.01$ , \*\*\*=  
712  $pV \leq 0.001$ . C) Total RNA 2hrs post-challenge with 6B, Tigr4 or IL-1 $\beta$  was harvested from A549 cells  
713 treated with either 10 $\mu$ M BAY 11-7082, 10 $\mu$ M GSK-J4, or DMSO vehicle control (n=4). Transcript levels  
714 for *PTGS2*, *IL-11* and *KDM6B* determined by RT-PCR. Bar graph  $\pm$  Std. Student's T-Test to untreated, \*=  
715  $pV \leq 0.05$ , \*\*=  $pV \leq 0.01$ , \*\*\*=  $pV \leq 0.001$ .

716

717 **Figure 3: 6B induces IL-11 promoter rearrangement.** Chromatin was obtained from untreated (blue) and  
718 10 $\mu$ M GSK-J4 (light blue) treated A549 cells 2hrs post-challenge with 6B in comparison to uninfected  
719 (untreated white; treated gray). 10  $\mu$ g chromatin input used for ChIP of p65, KDM6B, H3K27me3 and  
720 histone H3 (H3), followed by ChIP-qPCR at locations (P6, P3 & P2) spanning the NF- $\kappa$ B sites upstream of  
721 the transcriptional start site (TSS). A) Schematic of IL-11 promoter with ChIP-qPCR primer locations (P6,  
722 P3 & P2) and NF- $\kappa$ B sites. B - F) % recovery of input for p65 (B), KDM6B (C), H3K27me3 normalized to H3  
723 (D), H3K27me2 normalized to H3 (F), or H3 (E) bound at P6, P3 & P2 in untreated and GSK-J4 treated

724 samples (n=3 untreated; n=2 GSK-J4 treated). Tukey box and whisker plot with dots representing  
725 outliers. Student's T-Test comparisons for untreated to GSK-J4 treated or 6B infected to uninfected, \*=  
726  $pV \leq 0.05$ , \*\*=  $pV \leq 0.01$ , \*\*\*=  $pV \leq 0.001$ , ns=not significant.

727

728 **Figure 4: *KDM6B* and *IL-11* contribute to epithelial cell integrity in response to pneumococcus.** A549 cells  
729 untreated or treated with 10 $\mu$ M GSK-J4 or 500ng/mL recombinant human IL-11 prior to 2hr challenge  
730 with either Tigr4 or 6B. Post-challenge cells are incubated with Trypan blue for cell integrity, fixed with  
731 2.5% paraformaldehyde and imaged with a brightfield microscope. A) Representative image of GSK-J4  
732 treated A549 cells post 2hr challenge. Scale = 100 $\mu$ M. B) % Trypan positive cells between untreated and  
733 GSK-J4 treated (pink) (n=4; 200-300 cells per replicate and group). Uninfected white, Tigr4 gray and 6B  
734 blue. Tukey box and whisker plot. C) Representative image of IL-11 treated A549 cells post 2hr  
735 challenge. Scale = 100 $\mu$ M. D) % Trypan positive cells between untreated and IL-11 treated (green) (n=4;  
736 200-300 cells per replicate and group). Uninfected white, Tigr4 gray and 6B blue. Tukey box and whisker  
737 plot. E) % Cytotoxicity (LDH release) from A549 supernatants 2hrs post-challenge (n=4; 2-3 technicals  
738 per replicate). Bar graph  $\pm$  Std. F) Total RNA harvested from A549 cells 2hrs post-challenge with isolates  
739 of serotypes 6B, 19F, 19A, and two isolates of 1 (hemolytic and non-hemolytic Ply). Relative expression  
740 of *IL-11* to uninfected cells. All data analyzed by One way-ANOVA with Tukey's multiple comparison  
741 post-hoc test, \*\*=  $pV \leq 0.01$ , \*\*\*=  $pV \leq 0.001$ , ns=not significant.

742

743 **Figure 5: *KDM6B* is required for host response to serotype 6B.** C57B6 mice (~9weeks) were challenged  
744 intranasally with 3 - 4x10<sup>6</sup> CFU of Tigr4 or 6B supplemented with either DMSO (vehicle control) or 5mM  
745 GSK-J4. At indicated endpoints bacterial load was enumerated by conventional CFU counts on 5 $\mu$ g/mL  
746 Gentamicin Columbia Blood agar selection plates from the nasal lavage (NL), bronchoalveolar lavage  
747 fluid (BALF), lungs, and spleen of infected animals. DMSO Tigr4 white, GSK-J4 Tigr4 gray, DMSO 6B light  
748 blue, GSK-J4 6B dark blue. A) 24hrs post-inoculation CFU burden of indicated samples (n=10). B) 48hrs  
749 post-inoculation CFU burden of indicated samples (n=4). Tukey box and whisker plot with dots  
750 representing outliers. One way-ANOVA non-parametric Kruskal-Wallis with Dunn's multiple comparison  
751 post-hoc test, \*=  $pV \leq 0.05$ , \*\*=  $pV \leq 0.01$ , \*\*\*=  $pV \leq 0.001$ , ns=not significant. CFU=colony forming unit.  
752 Dotted lines =Limit of detection (LD). LD for each organ: NL (50 CFU); BALF, Lung and Spleen (1000 CFU).

753

754 **Supplemental Figure 1: *KDM6B* microscopy and demethylase RT-PCR.** A) Representative images of  
755 nuclear KDM6B (green) merged with nucleus stained with DAPI (false colored red for visual display).

756 Scale = 10 $\mu$ m. B) Total RNA 2hrs post-challenge with 6B or Tigr4 from A549 cells. Demethylase panel RT-  
757 PCR shown as  $\Delta$ Ct (n=3; 3 technicals per biological replicate). Bar graph  $\pm$  Std. All data analyzed by One  
758 way-ANOVA with Tukey's multiple comparison post-hoc test, \*\*= pV $\leq$ 0.01, ns=not significant.

759

760 **Supplemental Figure 2: Tigr4 and IL-1 $\beta$  inhibitor RT-PCR with viability data.** A549 cells untreated or  
761 treated with 10 $\mu$ M BAY 11-7082, 10 $\mu$ M GSK-J4, or DMSO vehicle control (n=4). A) Cell viability  
762 determined by AlamarBlue. Expressed as % of untreated cells. No significant difference observed. B)  
763 Transcript levels for *IL-11*, *KDM6B* and *PTGS2* determined by RT-PCR. Displayed as  $\Delta$ Ct for comparison to  
764 untreated (n=4). Bar graph  $\pm$  Std. All data analyzed by One way-ANOVA with Tukey's multiple  
765 comparison post-hoc test, no significant difference observed.

766

767 **Supplemental Figure 3: ChIP-PCR IL-11 locus for Tigr4 and IL-1 $\beta$ .** Chromatin obtained from untreated  
768 and 10 $\mu$ M GSK-J4 treated A549 cells 2hrs post-challenge with Tigr4 or IL-1 $\beta$ . 10  $\mu$ g chromatin input used  
769 for ChIP of p65, KDM6B, H3K27me3 and histone H3 (H3), followed by ChIP-qPCR at primer locations (P6,  
770 P3 & P2) spanning the NF- $\kappa$ B sites upstream of the transcriptional start site (TSS). A) Schematic of IL-11  
771 promoter with ChIP-qPCR primer locations (P6, P3 & P2) and the NF- $\kappa$ B sites. B - E) % recovery of input  
772 for p65, KDM6B, H3K27me3 normalized to H3, or H3 bound at P6, P3 & P2 in untreated and GSK-J4  
773 treated samples (n=3 untreated; n=2 GSK-J4 treated. Tukey box and whisker plot with dots representing  
774 outliers. No significant difference observed in comparison to 6B or uninfected cells from Fig. 3.

775

776 **Supplemental Figure 4: IL-11 RT-PCR with oral commensals.** A) Total RNA harvested from immortalized  
777 gingival keratinocytes challenged with *S. gordonii*, *S. sanguinis*, *S. oralis*, *E. corrodens* or *F. nucleatum*.  
778 Transcript levels for *IL-11* determined by RT-PCR and represented as relative expression to uninfected  
779 (n=1).

780

781 **Supplemental Figure 5: Tigr4 and 6B bacterial inoculates from animal challenges.** Tigr4 and 6B  
782 inoculums for animal intranasal challenge model in DMSO (vehicle control) or 5mM GSK-J4 (n=2).  
783 Conventional CFU enumeration shows no significant difference. Analyzed by One way-ANOVA with  
784 Tukey's multiple comparison post-hoc test, ns=not significant.

80mm

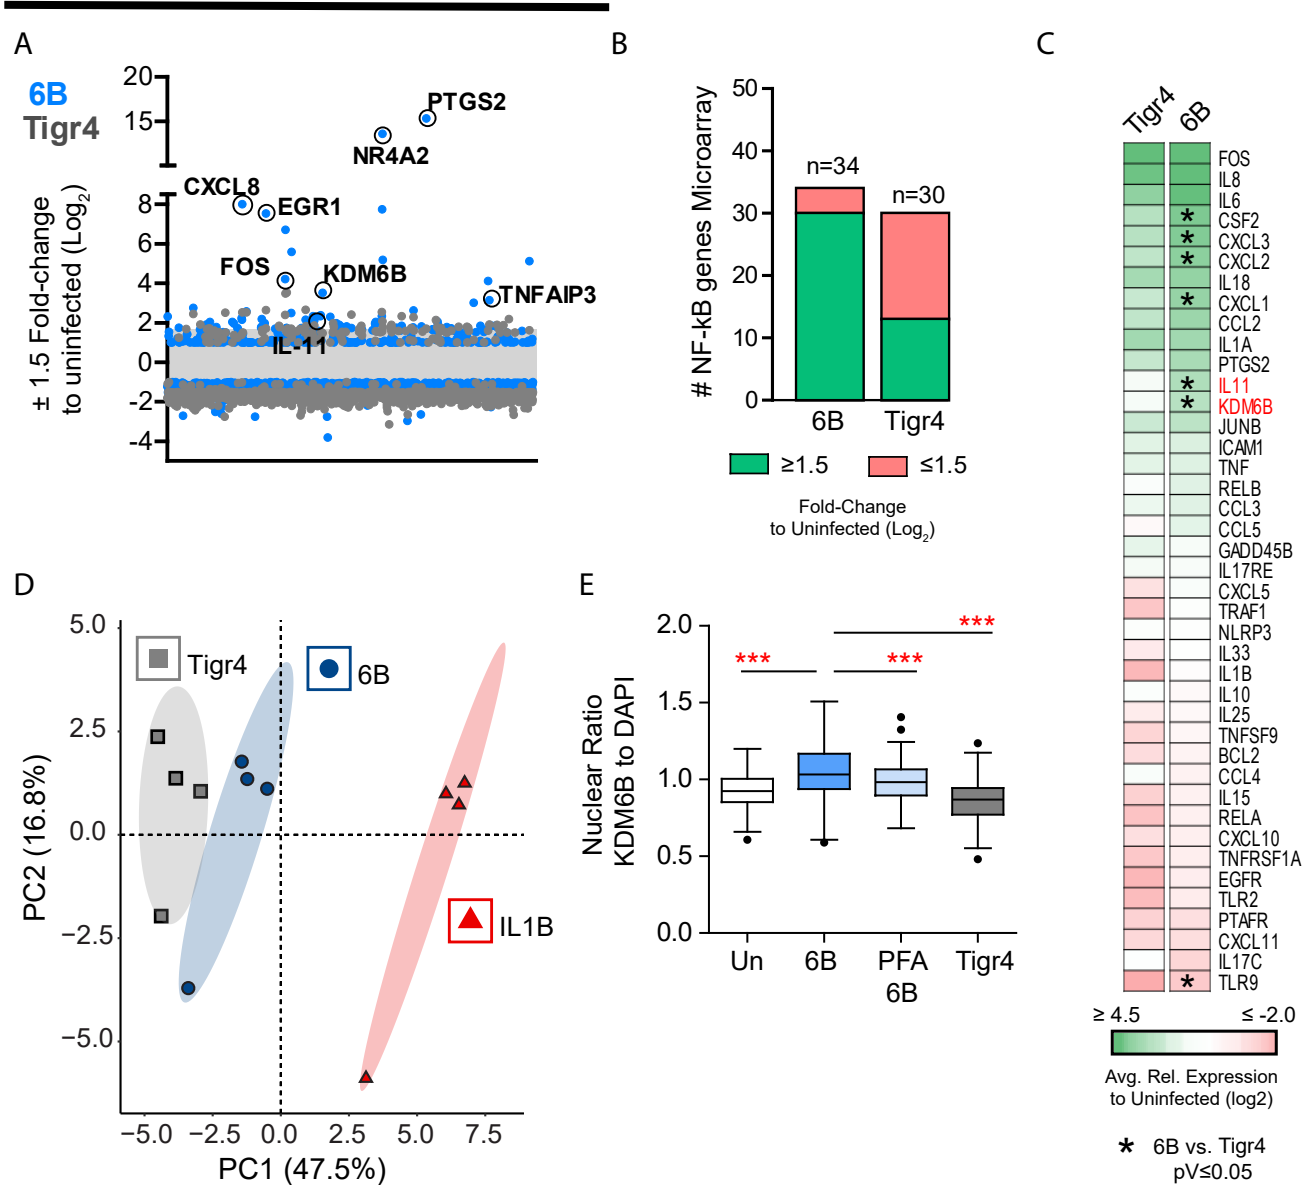

180mm

80mm

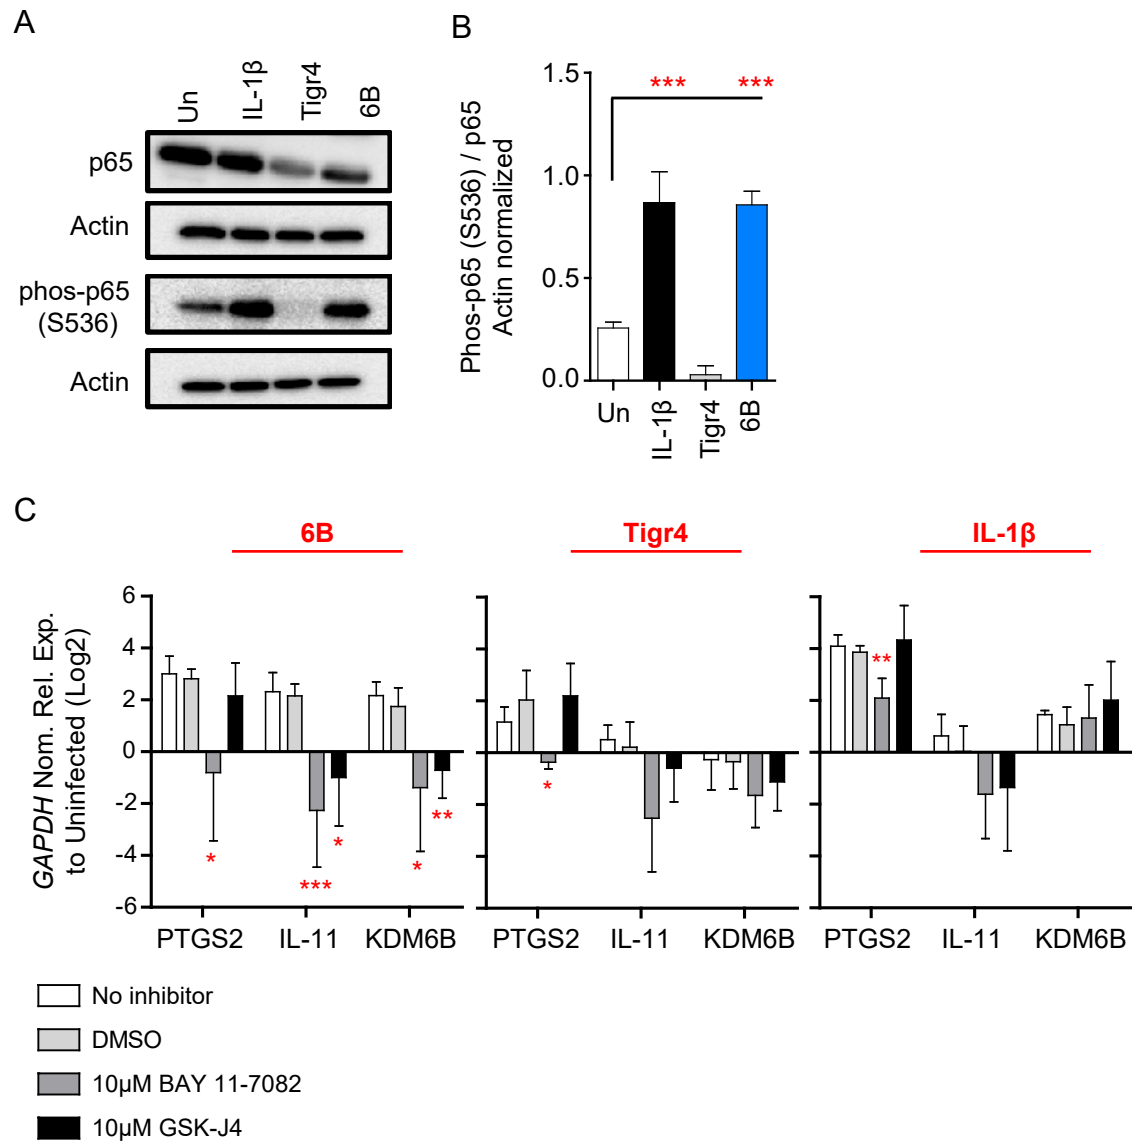

80mm

A

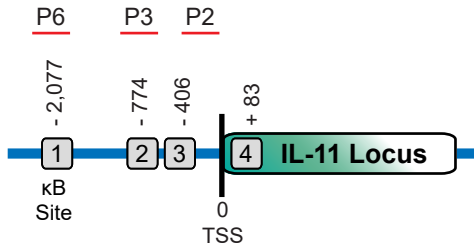

B

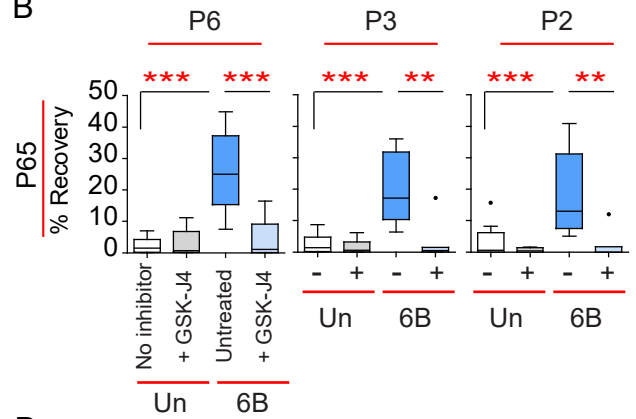

C

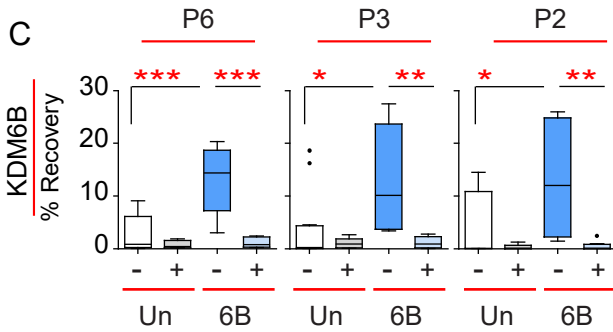

D

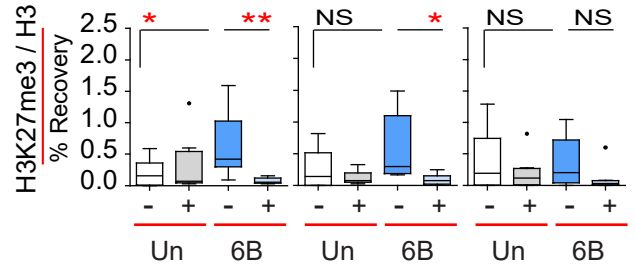

E

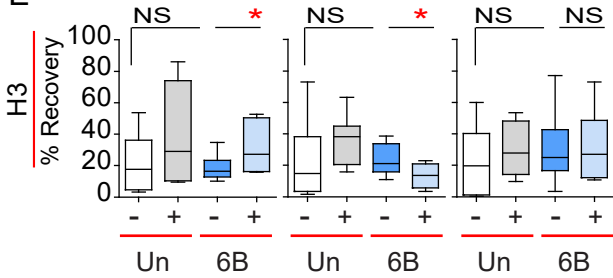

F

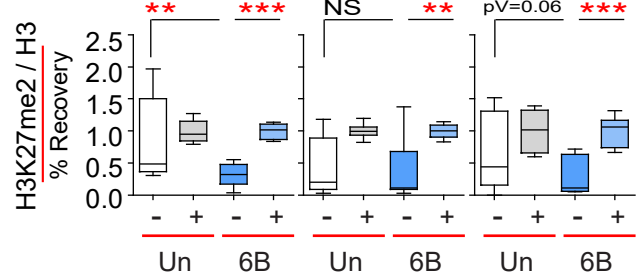

80mm

A

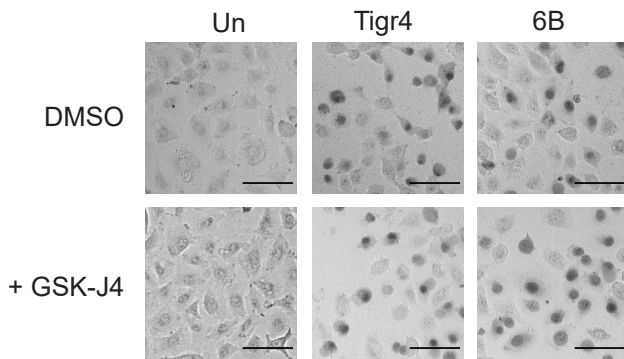

B

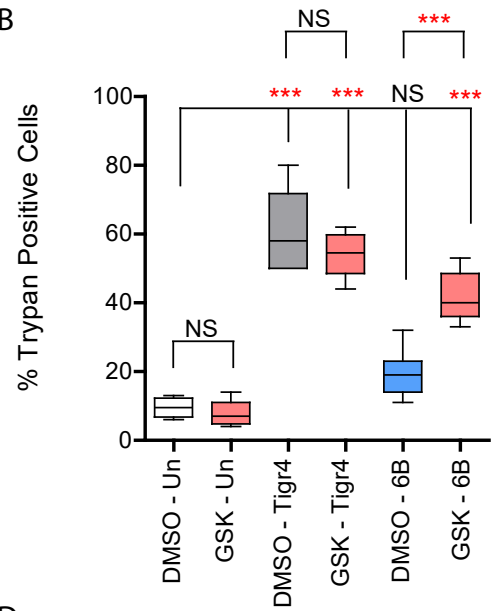

C

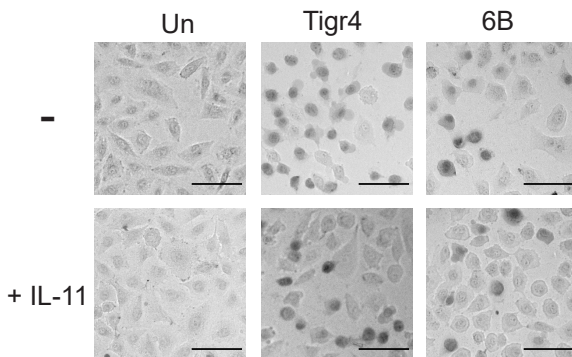

D

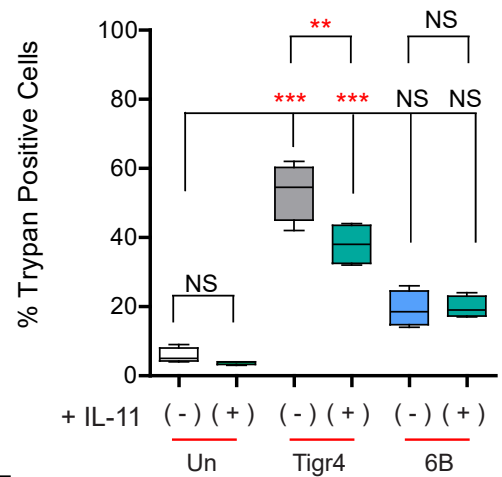

E

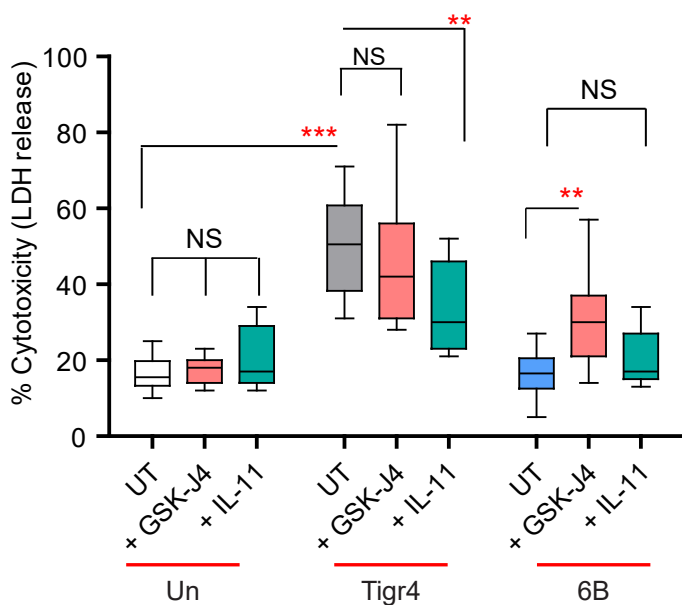

F

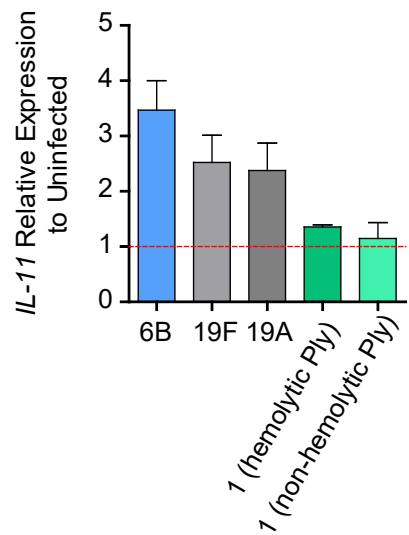

80mm

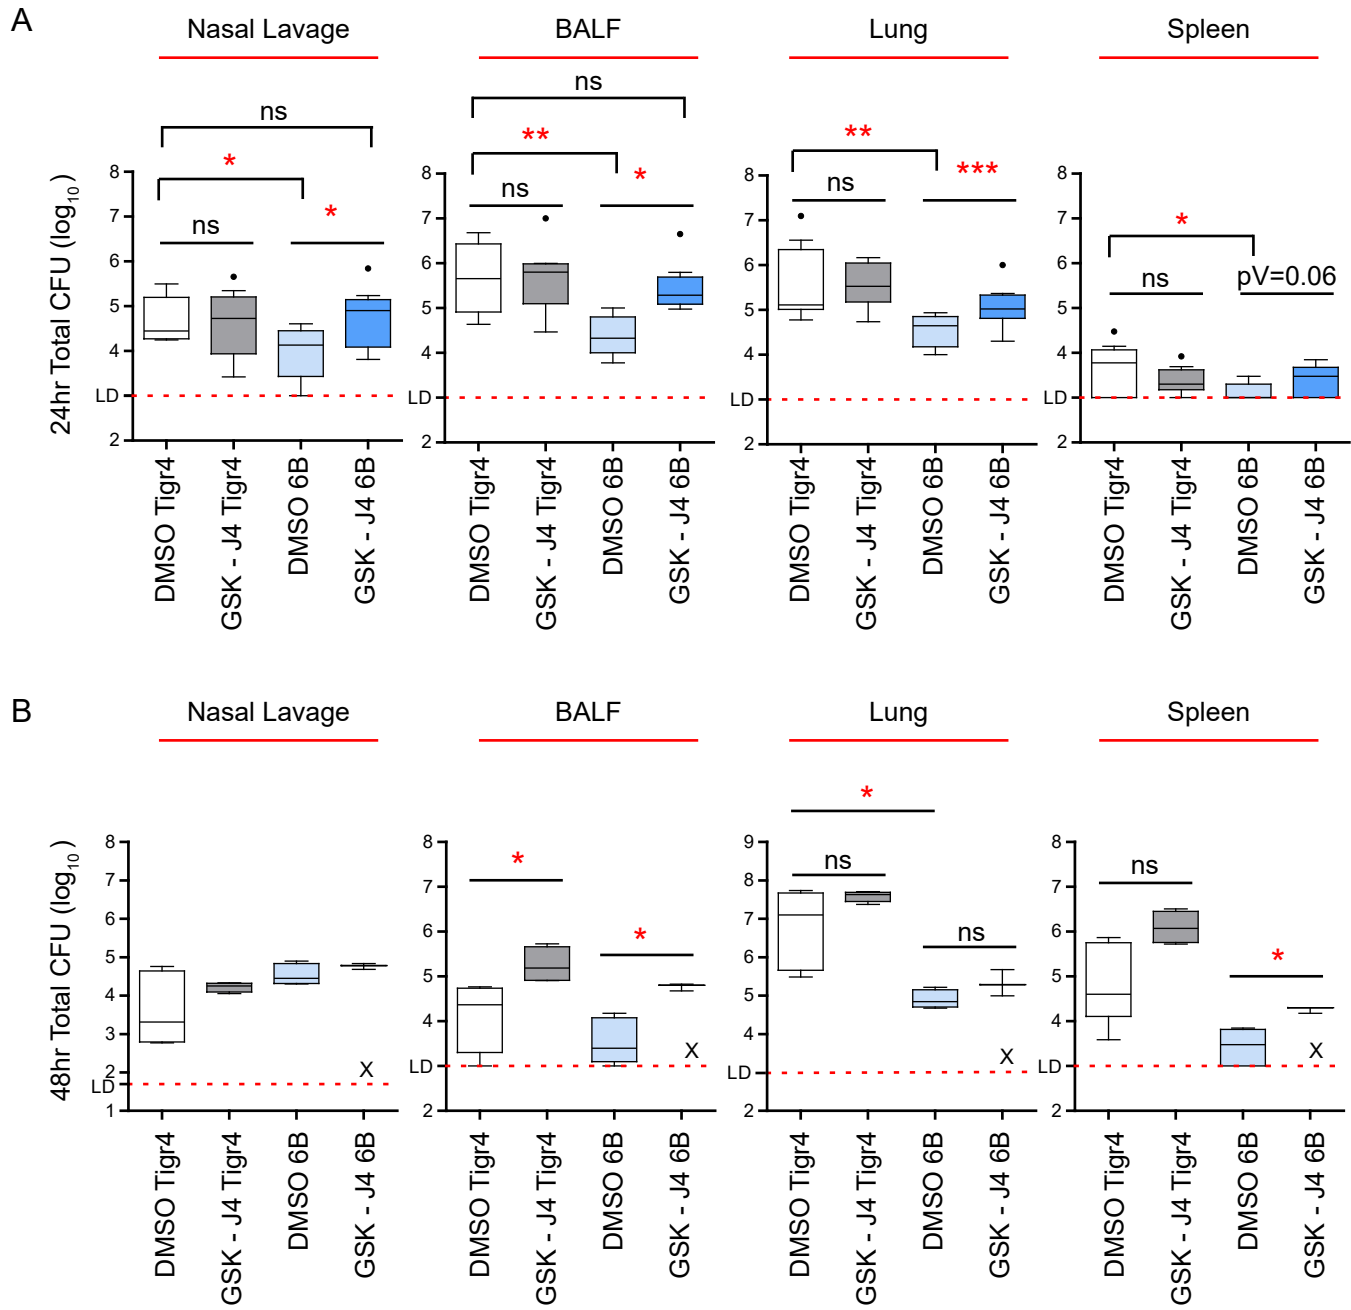

Source: https://www.biorxiv.org/content/10.1101/757906v1.full.pdf
